# Supplementary material
Source: publisher figshare collection journal article supplement (https://tandf.figshare.com/articles/dataset/_/19554674)
Supplement: Supplementary file 1 [file 2]

Appendix A

| Map ID           | Map Title                        | Year | State | T-R-S        | Scale | Reference      |
|------------------|----------------------------------|------|-------|--------------|-------|----------------|
| 09-01            | Gordon No. 3 Mine (Burnham -T    | 1970 | OK    | 29N-23E-18   | 1-50  | Keheley (2020) |
| 1_Plate_1_1958   | Plate_1                          | 1958 | KS    | Picher Field | 1-300 | MDHC (2020)    |
| 2_Plate_2_1958   | Plate_2                          | 1958 | KS    | Picher Field | 1-300 | MDHC (2020)    |
| 3_Plate_3_1958   | Plate_3                          | 1958 | KS    | Picher Field | 1-300 | MDHC (2020)    |
| 4_Plate_4_1958   | Plate_4                          | 1958 | KS    | Picher Field | 1-300 | MDHC (2020)    |
| 5_Plate_5_1956   | Plate_5                          | 1956 | OK    | Picher Field | 1-300 | MDHC (2020)    |
| 6_Plate_6_1958   | Plate_6                          | 1958 | OK    | Picher Field | 1-300 | MDHC (2020)    |
| 7_Plate_7_1958   | Plate_7                          | 1958 | OK    | Picher Field | 1-300 | MDHC (2020)    |
| 8_Plate_8_1958   | Plate_8                          | 1958 | OK    | Picher Field | 1-300 | MDHC (2020)    |
| 9_Plate_9_1958   | Plate_9                          | 1958 | OK    | Picher Field | 1-300 | MDHC (2020)    |
| 10_Plate_10_1958 | Plate_10                         | 1958 | OK    | Picher Field | 1-300 | MDHC (2020)    |
| 11_Plate_11_1956 | Plate_11                         | 1956 | OK    | Picher Field | 1-300 | MDHC (2020)    |
| 12_Plate_12_1956 | Plate_12                         | 1956 | OK    | Picher Field | 1-300 | MDHC (2020)    |
| 17-02            | Midas Mine                       | 1959 | OK    | 29N-23E-28   | 1-50  | Keheley (2020) |
| 17-04            | New Chicago No 2 North half Mine | 1959 | OK    | 29N-23E-28   | 1-50  | Keheley (2020) |
| 17-05            | New Chicago No 1 Mine            | 1959 | OK    | 29N-23E-28   | 1-50  | Keheley (2020) |
| 17-06            | Buffalo Calf West Half Mine      | 1959 | OK    | 29N-23E-28   | 1-50  | Keheley (2020) |
| 17-08            | Skelton Mine, South Half         | 1959 | OK    | 29N-23E-28   | 1-50  | Keheley (2020) |
| 17-09            | Skelton Mine, North Half         | 1957 | OK    | 29N-23E-28   | 1-50  | Keheley (2020) |
| 17-10            | New Chicago No 2 Southhalf Mine  | 1957 | OK    | 29N-23E-28   | 1-50  | Keheley (2020) |
| 18-07            | Big Chief Mine                   | 1967 | OK    | 29N-23E-17   | 1-50  | Keheley (2020) |
| 18-13            | Goodwin Mine                     | 1967 | OK    | 29N-23E-17   | 1-50  | Keheley (2020) |
| 19-01            | Baby Jim Mine                    | 1960 | OK    | 29N-23E-29   | 1-50  | Keheley (2020) |
| 19-03            | Admiralty No 3 Mine              | 1966 | OK    | 29N-23E-29   | 1-100 | Keheley (2020) |
| 19-04            | Skelton Mine                     | 1957 | OK    | 29N-23E-29   | 1-50  | Keheley (2020) |
| 19-05            | Skelton Mine                     | 1957 | OK    | 29N-23E-29   | 1-50  | Keheley (2020) |
| 19-07            | Skelton Mine                     | 1959 | OK    | 29N-23E-29   | 1-50  | Keheley (2020) |
| 20-01            | M Bed                            | 1959 | OK    | 29N-23E-19   | 1-100 | Keheley (2020) |
| 28N22E1_06       | Cactus Mine                      | ND   | OK    | 28N-22E-1    | 1-100 | Keheley (2020) |
| 28N22E1_10       | West Commerce w/ drill logs      | ND   | OK    | 28N-22E-1    |       | Keheley (2020) |
| 28N22E1_16       | North-Northwest Commerce Area    |      | OK    | 28N-22E-1    | 1-40  | MDHC (2020)    |
| 28N22E1_25       | Northwest Commerce Area          | ND   | OK    | 28N-22E-1    | 1-50  | Keheley (2020) |
| 28N22E12_01      | Lost Trail Mine                  | ND   | OK    | 28N-22E-12   | 1-40  | Keheley (2020) |

Appendix A Continued

| Map ID      | Map Title                            | Year | State | T-R-S      | Scale | Reference      |
|-------------|--------------------------------------|------|-------|------------|-------|----------------|
| 28N22E12_04 | Crowe Mining Tract                   | 1947 | OK    | 28N-22E-12 | 1-100 | Keheley (2020) |
| 28N23E1_02  | Mission Mine_Negative of 01          | 1907 | OK    | 28N-23E-1  | 1-30  | Keheley (2020) |
| 28N23E7_01  | Commerce area plan map               | 1913 | OK    | 28N-23E-7  | 1-50  | MDHC (2020)    |
| 28N24E6_01  | Valliere Mine                        | 1944 | OK    | 28N-24E-6  | 1-100 | Keheley (2020) |
| 29N22E13_01 | Laura Jenny Zheka Wilson             | 193? | OK    | 29N-22E-13 | 1-100 | MDHC (2020)    |
| 29N22E13_04 | Bird Dog Mine                        | 1945 | OK    | 29N-22E-13 | 1-100 | MDHC (2020)    |
| 29N22E13_05 | Bob White & Mehunka Mine             | 1948 | OK    | 29N-22E-13 | 1-100 | MDHC (2020)    |
| 29N22E14_01 | Wild Bull                            | ND   | OK    | 29N-22E-14 |       | MDHC (2020)    |
| 29N22E23_01 | Xavier Mine                          | 1933 | OK    | 29N-22E-23 | 1-50  | MDHC (2020)    |
| 29N22E24_01 | Bob White Mine East 40               | 1955 | OK    | 29N-22E-24 | 1-50  | Keheley (2020) |
| 29N22E24_02 | Bob White Mine West 40               | 1955 | OK    | 29N-22E-24 | 1-50  | Keheley (2020) |
| 29N22E24_03 | Little Greenback Mine                | 1965 | OK    | 29N-22E-24 | 1-50  | Keheley (2020) |
| 29N22E24_04 | Garrett Mine                         | 1957 | OK    | 29N-22E-24 | 1-50  | Keheley (2020) |
| 29N22E24_09 | Bird Dog Mine                        | 1951 | OK    | 29N-22E-24 | 1-100 | MDHC (2020)    |
| 29N22E24_11 | Bird Dog Mine_Similar or same as _10 | 1945 | OK    | 29N-22E-24 | 1-100 | MDHC (2020)    |
| 29N22E24_17 | Kitty Mine                           | 1950 | OK    | 29N-22E-24 | 1-100 | MDHC (2020)    |
| 29N22E24_19 | Kitty Mine                           | 1954 | OK    | 29N-22E-24 | 1-50  | MDHC (2020)    |
| 29N22E25_01 | Goodeagle Mine                       | 1963 | OK    | 29N-22E-25 | 1-100 | Keheley (2020) |
| 29N22E25_04 | Wilson Mine                          | 1942 | OK    | 29N-22E-25 | 1-100 | MDHC (2020)    |
| 29N22E25_07 | Goodeagle Mine                       | 1945 | OK    | 29N-22E-25 | 1-100 | MDHC (2020)    |
| 29N22E25_09 | Wilson and Bluebird                  | ND   | OK    | 29N-22E-25 | 1-100 | MDHC (2020)    |
| 29N22E25_14 | Blue Bird-Wilson Mine                | 1949 | OK    | 29N-22E-25 | 1-100 | MDHC (2020)    |
| 29N22E25_15 | Roanoke Mine                         | ND   | OK    | 29N-22E-25 | 1-50  | MDHC (2020)    |
| 29N22E36_01 | Roanoke and Smokey-Hill              | 1946 | OK    | 29N-22E-36 | 1-100 | Keheley (2020) |
| 29N22E36_07 | Roanoke Mine                         | ND   | OK    | 29N-22E-36 | 1-100 | MDHC (2020)    |
| 29N23E13_01 | NiDay No. 1                          | 1952 | OK    | 29N-23E-13 | 1-100 | Keheley (2020) |
| 29N23E13_02 | Scott                                | ND   | OK    | 29N-23E-13 |       | MDHC (2020)    |
| 29N23E13_03 | Scott                                | ND   | OK    | 29N-23E-13 |       | MDHC (2020)    |
| 29N23E13_04 | Scott                                | ND   | OK    | 29N-23E-13 |       | MDHC (2020)    |
| 29N23E14_01 | Dobson Lease NWSW                    | 1966 | OK    | 29N-23E-14 | 1-50  | Keheley (2020) |
| 29N23E14_03 | Dobson Lease                         | ND   | OK    | 29N-23E-14 | 1-40  | Keheley (2020) |
| 29N23E14_04 | Blue Ribbon                          | 1946 | OK    | 29N-23E-14 | 1-100 | Keheley (2020) |
| 29N23E14_06 | Farmington                           | ND   | OK    | 29N-23E-14 | 1-50  | Keheley (2020) |

Appendix A Continued

| Map ID      | Map Title                   | Year | State | T-R-S      | Scale | Reference      |
|-------------|-----------------------------|------|-------|------------|-------|----------------|
| 29N23E14_07 | Lucky Jack Mine             | ND   | OK    | 29N-23E-14 | 1-50  | Keheley (2020) |
| 29N23E14_08 | Structure Map               | 1946 | OK    | 29N-23E-14 | 1-100 | Keheley (2020) |
| 29N23E14_09 | Farmington                  | 1937 | OK    | 29N-23E-14 | 1-50  | Keheley (2020) |
| 29N23E14_10 | Dobson (east side)          | 1952 | OK    | 29N-23E-14 | 1-40  | MDHC (2020)    |
| 29N23E14_11 | Dobson (West side)          | 195? | OK    | 29N-23E-14 | 1-40  | MDHC (2020)    |
| 29N23E15_01 | Beck Mining Co              | 1928 | OK    | 29N-23E-15 |       | MDHC (2020)    |
| 29N23E15_03 | Brewster Mine               | 1952 | OK    | 29N-23E-15 | 1-100 | MDHC (2020)    |
| 29N23E15_05 | Mine No. 2 (North Brewster) | 1927 | OK    | 29N-23E-15 | 1-50  | MDHC (2020)    |
| 29N23E15_06 | Brewster Mine (North)       | 1952 | OK    | 29N-23E-15 | 1-100 | MDHC (2020)    |
| 29N23E15_07 | Brewster Mine (northeast)   | 1927 | OK    | 29N-23E-15 | 1-50  | MDHC (2020)    |
| 29N23E15_08 | WM&W                        | ND   | OK    | 29N-23E-15 | 1-200 | MDHC (2020)    |
| 29N23E15_11 | Mary Ann                    | ND   | OK    | 29N-23E-15 | 1-100 | MDHC (2020)    |
| 29N23E15_13 | Mary Ann                    | 1950 | OK    | 29N-23E-15 | 1-40  | MDHC (2020)    |
| 29N23E15_14 | Mary Ann                    | ND   | OK    | 29N-23E-15 | 1-40  | MDHC (2020)    |
| 29N23E15_15 | Mary Ann                    | ND   | OK    | 29N-23E-15 | 1-40  | MDHC (2020)    |
| 29N23E15_18 | Golden Eagle                | ND   | OK    | 29N-23E-15 | 1-40  | MDHC (2020)    |
| 29N23E15_19 | Shaffer                     | ND   | OK    | 29N-23E-15 | 1-50  | MDHC (2020)    |
| 29N23E15_21 | Crutchfield                 | 1925 | OK    | 29N-23E-15 | 1-40  | MDHC (2020)    |
| 29N23E16_01 | Swift WNW                   | ND   | OK    | 29N-23E-16 | 1-50  | Keheley (2020) |
| 29N23E16_03 | Swift ENW                   | 1966 | OK    | 29N-23E-16 | 1-50  | Keheley (2020) |
| 29N23E16_04 | CommonWealth                | ND   | OK    | 29N-23E-16 | 1-50  | Keheley (2020) |
| 29N23E16_05 | Cortez Mine                 | 1945 | OK    | 29N-23E-16 | 1-50  | Keheley (2020) |
| 29N23E16_06 | Eudora WhiteBird            | 1966 | OK    | 29N-23E-16 | 1-50  | Keheley (2020) |
| 29N23E16_08 | Whitebird Mine              | 1966 | OK    | 29N-23E-16 | 1-50  | Keheley (2020) |
| 29N23E16_09 | Swift-CommonWealth          | 1965 | OK    | 29N-23E-16 | 1-50  | Keheley (2020) |
| 29N23E16_12 | Hunt Mine                   | ND   | OK    | 29N-23E-16 | 1-50  | MDHC (2020)    |
| 29N23E17_03 | Crawfish                    | 1966 | OK    | 29N-23E-17 | 1-50  | Keheley (2020) |
| 29N23E17_04 | Big Chief                   | 1958 | OK    | 29N-23E-17 | 1-50  | Keheley (2020) |
| 29N23E17_07 | Goodwin Mine                | 1966 | OK    | 29N-23E-17 | 1-50  | Keheley (2020) |
| 29N23E17_08 | Howe Mine                   | 1966 | OK    | 29N-23E-17 | 1-50  | Keheley (2020) |
| 29N23E17_09 | LaSalle                     | 1964 | OK    | 29N-23E-17 | 1-50  | Keheley (2020) |
| 29N23E17_10 | Lucky Syndicate             | 1965 | OK    | 29N-23E-17 | 1-50  | Keheley (2020) |
| 29N23E17_11 | Lucky Syndicate             | 1966 | OK    | 29N-23E-17 | 1-50  | Keheley (2020) |

Appendix A Continued

| Map ID      | Map Title                                                  | Year  | State | T-R-S      | Scale | Reference      |
|-------------|------------------------------------------------------------|-------|-------|------------|-------|----------------|
| 29N23E17_12 | Netta White Mine                                           | 1965  | OK    | 29N-23E-17 | 1-50  | Keheley (2020) |
| 29N23E17_14 | Piokee                                                     | 1966  | OK    | 29N-23E-17 | 1-50  | Keheley (2020) |
| 29N23E17_16 | Otis White                                                 | 1966  | OK    | 29N-23E-17 | 1-50  | Keheley (2020) |
| 29N23E17_17 | Ohimo Mine                                                 | 1951  | OK    | 29N-23E-17 | 1-50  | Keheley (2020) |
| 29N23E17_18 | Slim Jim                                                   | 1954  | OK    | 29N-23E-17 | 1-50  | Keheley (2020) |
| 29N23E18_03 | Gordon No 2 Mine                                           | ND    | OK    | 29N-23E-18 | 1-50  | Keheley (2020) |
| 29N23E18_04 | Gordon No 3 Mine NESE                                      | 1965  | OK    | 29N-23E-18 | 1-50  | Keheley (2020) |
| 29N23E18_05 | Gordon No 3 Mine NESE                                      | 1966  | OK    | 29N-23E-18 | 1-50  | Keheley (2020) |
| 29N23E18_07 | Gordon No 3 Mine NWSE                                      | 1966  | OK    | 29N-23E-18 | 1-50  | Keheley (2020) |
| 29N23E18_09 | Gordon No 3 Mine SENE                                      | 1966  | OK    | 29N-23E-18 | 1-50  | Keheley (2020) |
| 29N23E18_10 | Gordon No 3 Mine SESE                                      | 1965  | OK    | 29N-23E-18 | 1-50  | Keheley (2020) |
| 29N23E18_11 | Gordon No 3 Mine SESE                                      | 1966  | OK    | 29N-23E-18 | 1-50  | Keheley (2020) |
| 29N23E18_15 | Pelican Mine                                               | ND    | OK    | 29N-23E-18 | 1-100 | MDHC (2020)    |
| 29N23E18_21 | Ton-Gah-Hah Beaver                                         | 1943  | OK    | 29N-23E-18 | 1-100 | MDHC (2020)    |
| 29N23E19_02 | Anna Beaver Mine NENE (Quarter of 01)                      | 1963  | OK    | 29N-23E-19 | 1-50  | Keheley (2020) |
| 29N23E19_03 | Anna Beaver Mine SENE (Quarter of 01)                      | 1963  | OK    | 29N-23E-19 | 1-50  | Keheley (2020) |
| 29N23E19_04 | Anna Beaver Mine SENW (Quarter of 01)                      | 1957  | OK    | 29N-23E-19 | 1-50  | Keheley (2020) |
| 29N23E19_05 | Anna Beaver Mine SWNE (Quarter of 01)                      | 1952  | OK    | 29N-23E-19 | 1-50  | Keheley (2020) |
| 29N23E19_06 | Anna Beaver Mine NWNE (Quarter of 01)                      | 1963  | OK    | 29N-23E-19 | 1-50  | Keheley (2020) |
| 29N23E19_07 | Anna Beaver Mine SENW (Quarter of 01) at 1-100 scale of 04 | ND    | OK    | 29N-23E-19 | 1-100 | Keheley (2020) |
| 29N23E19_10 | John Beaver Mine NESE (Quarter of 08)                      | 1966  | OK    | 29N-23E-19 | 1-50  | Keheley (2020) |
| 29N23E19_11 | John Beaver Mine NWSE (Quarter of 08)                      | 1963  | OK    | 29N-23E-19 | 1-50  | Keheley (2020) |
| 29N23E19_13 | John Beaver Mine SWSE (Quarter of 08)                      | 1966  | OK    | 29N-23E-19 | 1-50  | Keheley (2020) |
| 29N23E19_14 | Crystal Central                                            | 1964  | OK    | 29N-23E-19 | 1-50  | Keheley (2020) |
| 29N23E19_15 | Harrisburg Mine                                            | 1956  | OK    | 29N-23E-19 | 1-50  | Keheley (2020) |
| 29N23E19_17 | Velie Lion Mine                                            | 1962  | OK    | 29N-23E-19 | 1-50  | Keheley (2020) |
| 29N23E19_20 | Foch Mine                                                  | 1945  | OK    | 29N-23E-19 | 1-40  | MDHC (2020)    |
| 29N23E19_22 | Ton Gah Hah Beaver                                         | 1939  | OK    | 29N-23E-19 | 1-100 | MDHC (2020)    |
| 29N23E19_24 | Velie Lion Mine                                            | 1954  | OK    | 29N-23E-19 | 1-50  | MDHC (2020)    |
| 29N23E19_25 | Harrisburg Mine                                            | 41953 | OK    | 29N-23E-19 | 1-50  | MDHC (2020)    |
| 29N23E19_26 | John Beaver Mine                                           | 1954  | OK    | 29N-23E-19 | 1-100 | MDHC (2020)    |
| 29N23E19_27 | Crystal Central                                            | 1941  | OK    | 29N-23E-19 | 1-50  | MDHC (2020)    |
| 29N23E20_01 | Barbara J                                                  | 1955  | OK    | 29N-23E-20 | 1-50  | Keheley (2020) |

Appendix A Continued

| Map ID      | Map Title                     | Year | State | T-R-S      | Scale | Reference      |
|-------------|-------------------------------|------|-------|------------|-------|----------------|
| 29N23E20_02 | Barbara J                     | 1955 | OK    | 29N-23E-20 | 1-100 | Keheley (2020) |
| 29N23E20_04 | Dorthy Bill E40_BW of 03      | 1955 | OK    | 29N-23E-20 | 1-50  | Keheley (2020) |
| 29N23E20_05 | Dorthy Bill E40               | 1965 | OK    | 29N-23E-20 | 1-50  | Keheley (2020) |
| 29N23E20_06 | Dorthy Bill W40               | 1955 | OK    | 29N-23E-20 | 1-50  | Keheley (2020) |
| 29N23E20_07 | Dorthy Bill W40               | 1965 | OK    | 29N-23E-20 | 1-50  | Keheley (2020) |
| 29N23E20_08 | Golden Hawk Mine              | 1944 | OK    | 29N-23E-20 | 1-50  | Keheley (2020) |
| 29N23E20_09 | Golden Hawk Mine              | 1954 | OK    | 29N-23E-20 | 1-50  | Keheley (2020) |
| 29N23E20_10 | Golden Hawk Mine              | 1965 | OK    | 29N-23E-20 | 1-50  | Keheley (2020) |
| 29N23E20_11 | Kenoyer Mine                  | 1955 | OK    | 29N-23E-20 | 1-100 | Keheley (2020) |
| 29N23E20_12 | Kenoyer Mine                  | 1966 | OK    | 29N-23E-20 | 1-100 | Keheley (2020) |
| 29N23E20_15 | Netta Mine East 40_BW of 14   | 1955 | OK    | 29N-23E-20 | 1-50  | Keheley (2020) |
| 29N23E20_16 | Netta Mine East 40            | 1965 | OK    | 29N-23E-20 | 1-50  | Keheley (2020) |
| 29N23E20_17 | Netta Mine East 40            | 1967 | OK    | 29N-23E-20 | 1-50  | Keheley (2020) |
| 29N23E20_18 | Netta Mine West 40            | 1954 | OK    | 29N-23E-20 | 1-50  | Keheley (2020) |
| 29N23E20_19 | Netta Mine West 40            | 1965 | OK    | 29N-23E-20 | 1-50  | Keheley (2020) |
| 29N23E20_20 | Oko                           | 1966 | OK    | 29N-23E-20 | 1-50  | Keheley (2020) |
| 29N23E20_21 | Premier                       | 1955 | OK    | 29N-23E-20 | 1-50  | Keheley (2020) |
| 29N23E20_22 | Premier                       | 1965 | OK    | 29N-23E-20 | 1-50  | Keheley (2020) |
| 29N23E20_23 | Rialto                        | 1955 | OK    | 29N-23E-20 | 1-100 | Keheley (2020) |
| 29N23E20_24 | St. Joe                       | 1955 | OK    | 29N-23E-20 | 1-50  | Keheley (2020) |
| 29N23E20_25 | St. Joe                       | 1965 | OK    | 29N-23E-20 | 1-50  | Keheley (2020) |
| 29N23E20_26 | Vantage Mine                  | 1953 | OK    | 29N-23E-20 | 1-50  | Keheley (2020) |
| 29N23E20_27 | Vantage Mine                  | 1965 | OK    | 29N-23E-20 | 1-50  | Keheley (2020) |
| 29N23E20_29 | Rialto No 4Mine L&G           | 1955 | OK    | 29N-23E-20 | 1-50  | MDHC (2020)    |
| 29N23E21_01 | Acme                          | 1929 | OK    | 29N-23E-21 | 1-100 | MDHC (2020)    |
| 29N23E21_04 | Grace Walker Mine K Bed       | 1954 | OK    | 29N-23E-21 | 1-100 | MDHC (2020)    |
| 29N23E21_05 | Grace Walker Mine M Bed       | 1954 | OK    | 29N-23E-21 | 1-100 | MDHC (2020)    |
| 29N23E21_07 | Black Eagle Mine              | 1963 | OK    | 29N-23E-21 | 1-50  | Keheley (2020) |
| 29N23E21_08 | Black Hawk Mine               | 1940 | OK    | 29N-23E-21 | 1-50  | Keheley (2020) |
| 29N23E21_11 | Eudora WhiteBird NENW         | 1966 | OK    | 29N-23E-21 | 1-50  | Keheley (2020) |
| 29N23E21_14 | Eudora WhiteBird East 40 NWNE | 1966 | OK    | 29N-23E-21 | 1-50  | Keheley (2020) |
| 29N23E21_18 | Grace Walker NWSE             | 1966 | OK    | 29N-23E-21 | 1-50  | Keheley (2020) |
| 29N23E21_19 | Jeff City West 40             | 1965 | OK    | 29N-23E-21 | 1-50  | Keheley (2020) |

Appendix A Continued

| Map ID      | Map Title                   | Year | State | T-R-S      | Scale | Reference      |
|-------------|-----------------------------|------|-------|------------|-------|----------------|
| 29N23E21_20 | Jeff City East 40           | 1964 | OK    | 29N-23E-21 | 1-50  | Keheley (2020) |
| 29N23E21_21 | Jefferson                   | 1964 | OK    | 29N-23E-21 | 1-50  | Keheley (2020) |
| 29N23E21_22 | Hudson-Bingham Mine         | 1951 | OK    | 29N-23E-21 | 1-50  | Keheley (2020) |
| 29N23E21_23 | New York                    | ND   | OK    | 29N-23E-21 | 1-50  | Keheley (2020) |
| 29N23E21_24 | New York                    | 1966 | OK    | 29N-23E-21 | 1-50  | Keheley (2020) |
| 29N23E21_25 | Grace Walker and Royal Mine | 1966 | OK    | 29N-23E-21 | 1-50  | Keheley (2020) |
| 29N23E21_26 | Royal                       | 1966 | OK    | 29N-23E-21 | 1-50  | Keheley (2020) |
| 29N23E21_28 | North Bingham Mine          | 1956 | OK    | 29N-23E-21 | 1-50  | MDHC (2020)    |
| 29N23E21_30 | Mahutska                    | 1946 | OK    | 29N-23E-21 | 1-50  | MDHC (2020)    |
| 29N23E21_32 | Jeff City                   | 1946 | OK    | 29N-23E-21 | 1-50  | MDHC (2020)    |
| 29N23E22_01 | Dardenne                    | 1939 | OK    | 29N-23E-22 | 1-50  | Keheley (2020) |
| 29N23E22_03 | Sam Douthat Land            | 1930 | OK    | 29N-23E-22 | 1-100 | Keheley (2020) |
| 29N23E22_04 | Quapaw District Allotment 7 | ND   | OK    | 29N-23E-22 | 1-100 | MDHC (2020)    |
| 29N23E22_07 | Tulsa                       | ND   | OK    | 29N-23E-22 | 1-50  | MDHC (2020)    |
| 29N23E22_08 | Mogul & Aztec               | 1953 | OK    | 29N-23E-22 | 1-50  | MDHC (2020)    |
| 29N23E22_10 | Indiana S80                 | 1929 | OK    | 29N-23E-22 | 1-50  | MDHC (2020)    |
| 29N23E22_14 | Huttig-Beck                 | ND   | OK    | 29N-23E-22 | 1-50  | MDHC (2020)    |
| 29N23E22_15 | Indiana N40                 | 1929 | OK    | 29N-23E-22 | 1-100 | MDHC (2020)    |
| 29N23E23_01 | Blue Bonnett_BW             | ND   | OK    | 29N-23E-23 | 1-50  | Keheley (2020) |
| 29N23E23_07 | H-K Mine                    | 1924 | OK    | 29N-23E-23 | 1-20  | MDHC (2020)    |
| 29N23E23_11 | Weiss                       | 1946 | OK    | 29N-23E-23 | 1-50  | MDHC (2020)    |
| 29N23E23_12 | Weiss Fee                   | ND   | OK    | 29N-23E-23 | 1-40  | MDHC (2020)    |
| 29N23E23_14 | Kropp Fee                   | ND   | OK    | 29N-23E-23 | 1-40  | MDHC (2020)    |
| 29N23E23_15 | Kropp Fee                   | ND   | OK    | 29N-23E-23 | 1-40  | MDHC (2020)    |
| 29N23E23_16 | Kropp Fee                   | ND   | OK    | 29N-23E-23 | 1-40  | MDHC (2020)    |
| 29N23E23_17 | Kropp Fee                   | 1935 | OK    | 29N-23E-23 | 1-40  | MDHC (2020)    |
| 29N23E23_19 | Mission                     | 1939 | OK    | 29N-23E-23 | 1-40  | MDHC (2020)    |
| 29N23E23_24 | Meteor and Aztec Mines_BW   | ND   | OK    | 29N-23E-23 | 1-100 | Keheley (2020) |
| 29N23E23_28 | Texas                       | ND   | OK    | 29N-23E-23 | 1-50  | MDHC (2020)    |
| 29N23E23_33 | Santa Fe                    | ND   | OK    | 29N-23E-23 | 1-40  | MDHC (2020)    |
| 29N23E23_37 | Weiss Land (Mission)        | 1945 | OK    | 29N-23E-23 | 1-100 | MDHC (2020)    |
| 29N23E23_38 | Portion of Mission Land     | ND   | OK    | 29N-23E-23 |       | MDHC (2020)    |
| 29N23E24_01 | Crane                       | ND   | OK    | 29N-23E-24 | 1-100 | MDHC (2020)    |

Appendix A Continued

| Map ID      | Map Title                             | Year | State | T-R-S      | Scale | Reference      |
|-------------|---------------------------------------|------|-------|------------|-------|----------------|
| 29N23E24_02 | Crane                                 | ND   | OK    | 29N-23E-24 | 1-100 | MDHC (2020)    |
| 29N23E24_05 | North Imbeau Mine                     | 1955 | OK    | 29N-23E-24 | 1-100 | MDHC (2020)    |
| 29N23E24_06 | South Imbeau Mine                     | 1941 | OK    | 29N-23E-24 | 1-100 | MDHC (2020)    |
| 29N23E24_08 | St. Lois No. 4 & Imbeau               | 1955 | OK    | 29N-23E-24 | 1-40  | MDHC (2020)    |
| 29N23E24_11 | St. Lois No. 4                        | 1955 | OK    | 29N-23E-24 | 1-40  | MDHC (2020)    |
| 29N23E24_13 | St. Lois No. 4                        | 1947 | OK    | 29N-23E-24 | 1-40  | MDHC (2020)    |
| 29N23E24_14 | St. Lois No. 4                        | ND   | OK    | 29N-23E-24 | 1-40  | MDHC (2020)    |
| 29N23E25_01 | Mary Jane                             | ND   | OK    | 29N-23E-25 | 1-40  | MDHC (2020)    |
| 29N23E26_06 | Minnie Greenback Clabber              | ND   | OK    | 29N-23E-26 | 1-100 | MDHC (2020)    |
| 29N23E26_08 | Allotment 3 - Peck Lease              | ND   | OK    | 29N-23E-26 | 1-100 | MDHC (2020)    |
| 29N23E27_01 | Arthur Buffalo                        | 1951 | OK    | 29N-23E-27 | 1-100 | MDHC (2020)    |
| 29N23E27_02 | First National                        | 1943 | OK    | 29N-23E-27 | 1-100 | MDHC (2020)    |
| 29N23E27_03 | Beetho Land (Pat)                     | ND   | OK    | 29N-23E-27 | 1-100 | MDHC (2020)    |
| 29N23E27_04 | Pat Mine                              | 1946 | OK    | 29N-23E-27 | 1-50  | MDHC (2020)    |
| 29N23E28_02 | Skelton Mine_BW of 01                 | 1954 | OK    | 29N-23E-28 | 1-50  | Keheley (2020) |
| 29N23E28_03 | Skelton Mine                          | 1954 | OK    | 29N-23E-28 | 1-50  | Keheley (2020) |
| 29N23E28_06 | Bull Frog C, D                        | 1943 | OK    | 29N-23E-28 | 1-50  | MDHC (2020)    |
| 29N23E28_07 | Bull Frog A, B                        | 1953 | OK    | 29N-23E-28 | 1-50  | MDHC (2020)    |
| 29N23E28_08 | Bull Frog C, D                        | 1943 | OK    | 29N-23E-28 | 1-50  | MDHC (2020)    |
| 29N23E28_10 | Lawyers Mine                          | 1949 | OK    | 29N-23E-28 | 1-40  | MDHC (2020)    |
| 29N23E28_11 | Lawyers Mine                          | 1952 | OK    | 29N-23E-28 | 1-40  | MDHC (2020)    |
| 29N23E28_13 | Midas 40 acres                        | ND   | OK    | 29N-23E-28 | 1-200 | MDHC (2020)    |
| 29N23E28_15 | Lawyers Mine                          | 1946 | OK    | 29N-23E-28 | 1-40  | MDHC (2020)    |
| 29N23E28_16 | Lawyers Mine                          | ND   | OK    | 29N-23E-28 | 1-200 | MDHC (2020)    |
| 29N23E28_17 | Frank Baffalo - Bull Frog Lease       | ND   | OK    | 29N-23E-28 | 1-100 | Keheley (2020) |
| 29N23E29_02 | Admiralty Mines 1,2,4, & 5_BW of 01   | ND   | OK    | 29N-23E-29 | 1-100 | Keheley (2020) |
| 29N23E29_05 | Admiralty Mine_03 map with elevations | 1936 | OK    | 29N-23E-29 | 1-100 | MDHC (2020)    |
| 29N23E29_06 | Admiralty Mines 1,2,4, & 5            | 1939 | OK    | 29N-23E-29 | 1-100 | MDHC (2020)    |
| 29N23E29_07 | AD No 4                               | 1945 | OK    | 29N-23E-29 | 1-50  | MDHC (2020)    |
| 29N23E29_09 | Admiralty Mines 1,2                   | 1945 | OK    | 29N-23E-29 | 1-50  | MDHC (2020)    |
| 29N23E29_11 | Baby Jim_With additional drawing      | 1946 | OK    | 29N-23E-29 | 1-50  | MDHC (2020)    |
| 29N23E29_12 | Baby Jim                              | 1955 | OK    | 29N-23E-29 | 1-50  | MDHC (2020)    |
| 29N23E29_14 | Barbara J East                        | 1955 | OK    | 29N-23E-29 | 1-50  | MDHC (2020)    |

Appendix A Continued

| Map ID      | Map Title                                     | Year | State | T-R-S      | Scale | Reference      |
|-------------|-----------------------------------------------|------|-------|------------|-------|----------------|
| 29N23E29_18 | Domado                                        | 1955 | OK    | 29N-23E-29 | 1-50  | MDHC (2020)    |
| 29N23E29_19 | Domado                                        | 1966 | OK    | 29N-23E-29 | 1-50  | Keheley (2020) |
| 29N23E29_20 | Douthat                                       | 1930 | OK    | 29N-23E-29 | 1-40  | MDHC (2020)    |
| 29N23E29_21 | Rialto                                        | 1966 | OK    | 29N-23E-29 | 1-50  | ODM (2020)     |
| 29N23E29_25 | Skelton NWSE                                  | 1952 | OK    | 29N-23E-29 | 1-50  | Keheley (2020) |
| 29N23E29_26 | Skelton SESE                                  | 1954 | OK    | 29N-23E-29 | 1-50  | Keheley (2020) |
| 29N23E29_27 | Skelton SESE - Color of _26                   | 1954 | OK    | 29N-23E-29 | 1-50  | MDHC (2020)    |
| 29N23E29_28 | Skelton NESE - Color of _24                   | 1952 | OK    | 29N-23E-29 | 1-50  | MDHC (2020)    |
| 29N23E29_33 | Barbara J.                                    | 1955 | OK    | 29N-23E-29 | 1-100 | MDHC (2020)    |
| 29N23E29_35 | Barbara J.                                    | 1955 | OK    | 29N-23E-29 | 1-50  | MDHC (2020)    |
| 29N23E29_36 | Skelton and Admiralty Lease                   | 1954 | OK    | 29N-23E-29 | 1-100 | Keheley (2020) |
| 29N23E29_39 | Admiralty Mines 1 & 2 upper level circle area | ND   | OK    | 29N-23E-29 | 1-50  | Keheley (2020) |
| 29N23E29_40 | Admiralty Mines 1 & 2                         | 1946 | OK    | 29N-23E-29 | 1-50  | Keheley (2020) |
| 29N23E29_41 | Admiralty Mine 1                              | 1952 | OK    | 29N-23E-29 | 1-100 | Keheley (2020) |
| 29N23E29_42 | Admiralty Mines 1, 2, 4, & 5                  | ND   | OK    | 29N-23E-29 | 1-100 | Keheley (2020) |
| 29N23E29_45 | Rialto No 1 & 2                               | ND   | OK    | 29N-23E-29 | 1-50  | Keheley (2020) |
| 29N23E29_46 | Rialto No 1 & 2                               | ND   | OK    | 29N-23E-29 | 1-50  | Keheley (2020) |
| 29N23E29_52 | Croesus-Domado-Bethel Mines                   | 1919 | OK    | 29N-23E-29 | 1-40  | ODM (2020)     |
| 29N23E30_03 | Blue Goose No 1                               | 1967 | OK    | 29N-23E-30 | 1-50  | Keheley (2020) |
| 29N23E30_07 | Blue Goose No 2 NE corner of 02               | 1967 | OK    | 29N-23E-30 | 1-50  | Keheley (2020) |
| 29N23E30_08 | Blue Goose No 2_M Bed                         | 1954 | OK    | 29N-23E-30 | 1-100 | Keheley (2020) |
| 29N23E30_10 | Blue Goose No 2_Sheet Ground                  | 1964 | OK    | 29N-23E-30 | 1-100 | Keheley (2020) |
| 29N23E30_12 | Bennie                                        | 1964 | OK    | 29N-23E-30 | 1-50  | Keheley (2020) |
| 29N23E30_14 | Hum-Bah-Wat-Tah Mine                          | 1967 | OK    | 29N-23E-30 | 1-50  | Keheley (2020) |
| 29N23E30_16 | Lottson Blue Goose, & HumBah Mines_M Bed      | 1954 | OK    | 29N-23E-30 | 1-100 | Keheley (2020) |
| 29N23E30_17 | Jaybird Mine                                  | 1965 | OK    | 29N-23E-30 | 1-50  | Keheley (2020) |
| 29N23E30_19 | Lottson                                       | 1958 | OK    | 29N-23E-30 | 1-50  | Keheley (2020) |
| 29N23E30_21 | Lucky Bill                                    | 1967 | OK    | 29N-23E-30 | 1-50  | Keheley (2020) |
| 29N23E30_22 | Ritz Mine - BW of _32                         | 1955 | OK    | 29N-23E-30 | 1-100 | Keheley (2020) |
| 29N23E30_24 | See-Sah                                       | 1967 | OK    | 29N-23E-30 | 1-100 | Keheley (2020) |
| 29N23E30_25 | Shorthorn                                     | 1965 | OK    | 29N-23E-30 | 1-50  | Keheley (2020) |
| 29N23E30_27 | Tom L Mine                                    | 1965 | OK    | 29N-23E-30 | 1-50  | Keheley (2020) |
| 29N23E30_31 | Woodchuck Mine                                | 1965 | OK    | 29N-23E-30 | 1-50  | Keheley (2020) |



Appendix A Continued

| Map ID      | Map Title                           | Year | State | T-R-S      | Scale | Reference      |
|-------------|-------------------------------------|------|-------|------------|-------|----------------|
| 29N23E30_32 | Ritz Mine                           | 1955 | OK    | 29N-23E-30 | 1-100 | MDHC (2020)    |
| 29N23E30_33 | Lottson - Blue Goose & Humbah Mines | 1954 | OK    | 29N-23E-30 | 1-100 | MDHC (2020)    |
| 29N23E31_04 | Southside Lower level               | ND   | OK    | 29N-23E-31 | 1-100 | Keheley (2020) |
| 29N23E31_06 | Southside Upper level               | 1956 | OK    | 29N-23E-31 | 1-100 | Keheley (2020) |
| 29N23E31_07 | DeVilliers Lease                    | ND   | OK    | 29N-23E-31 | 1-100 | Keheley (2020) |
| 29N23E32_01 | Beck                                | 1928 | OK    | 29N-23E-32 | 1-40  | MDHC (2020)    |
| 29N23E32_02 | Vanpool Lease                       | 1955 | OK    | 29N-23E-32 | 1-50  | MDHC (2020)    |
| 29N23E32_03 | Montreal Mining Co.                 | 1946 | OK    | 29N-23E-32 | 1-40  | MDHC (2020)    |
| 29N23E32_05 | Mabon-N80                           | 1939 | OK    | 29N-23E-32 | 1-50  | MDHC (2020)    |
| 29N23E32_06 | Mabon-N80                           | ND   | OK    | 29N-23E-32 | 1-50  | MDHC (2020)    |
| 29N23E32_07 | Montreal and Quebec                 | 1943 | OK    | 29N-23E-32 | 1-40  | MDHC (2020)    |
| 29N23E32_08 | Montreal and Quebec                 | ND   | OK    | 29N-23E-32 | 1-50  | Keheley (2020) |
| 29N23E33_02 | Craig East Half                     | ND   | OK    | 29N-23E-33 | 1-100 | MDHC (2020)    |
| 29N23E33_03 | Waxahatchie                         | 1945 | OK    | 29N-23E-33 | 1-40  | MDHC (2020)    |
| 29N23E33_08 | Craig West Half                     | 1954 | OK    | 29N-23E-33 | 1-100 | MDHC (2020)    |
| 29N23E33_09 | Bij Jim, Plumb                      | 1954 | OK    | 29N-23E-33 | 1-50  | MDHC (2020)    |
| 29N23E33_10 | Big Jim Mine                        | 1945 | OK    | 29N-23E-33 | 1-40  | MDHC (2020)    |
| 29N23E33_11 | Big Jim Mine_10 with contours       | 1945 | OK    | 29N-23E-33 | 1-40  | MDHC (2020)    |
| 29N23E34_03 | Ruth Goodeagle Allotment            | ND   | OK    | 29N-23E-34 |       | MDHC (2020)    |
| 29N23E35_02 | Buckeye Mine                        | ND   | OK    | 29N-23E-35 | 1-100 | MDHC (2020)    |
| 29N23E36_03 | Silver Streak                       | 1953 | OK    | 29N-23E-36 | 1-50  | Keheley (2020) |
| 29N24E17_04 | Discard                             | 1929 | OK    | 29N-24E-17 | 1-40  | MDHC (2020)    |
| 29N24E17_05 | Clark and Discard                   | ND   | OK    | 29N-24E-17 |       | MDHC (2020)    |
| 29N24E17_07 | Warren Lease                        | ND   | OK    | 29N-24E-17 |       | MDHC (2020)    |
| 29N24E17_08 | Clark                               | 1929 | OK    | 29N-24E-17 | 1-40  | MDHC (2020)    |
| 29N24E18_02 | Bingham Lease                       | ND   | OK    | 29N-24E-18 | 1-40  | MDHC (2020)    |
| 29N24E18_04 | Diamond Joe (Blue Streak)           | ND   | OK    | 29N-24E-18 | 1-40  | MDHC (2020)    |
| 29N24E19_02 | Campbell                            | 1938 | OK    | 29N-24E-19 | 1-40  | Keheley (2020) |
| 29N24E19_03 | Campbell                            | 1940 | OK    | 29N-24E-19 | 1-40  | Keheley (2020) |
| 29N24E19_06 | Malsbury                            | 1943 | OK    | 29N-24E-19 | 1-40  | Keheley (2020) |
| 29N24E19_07 | Malsbury                            | 1928 | OK    | 29N-24E-19 | 1-40  | MDHC (2020)    |
| 29N24E19_08 | Malsbury                            | 1943 | OK    | 29N-24E-19 | 1-40  | MDHC (2020)    |
| 29N24E19_11 | Bendene Lease                       | 1926 | OK    | 29N-24E-19 | 1-40  | MDHC (2020)    |

Appendix A Continued

| Map ID      | Map Title                                       | Year | State | T-R-S      | Scale | Reference      |
|-------------|-------------------------------------------------|------|-------|------------|-------|----------------|
| 29N24E19_14 | Campbell                                        | ND   | OK    | 29N-24E-19 | 1-40  | MDHC (2020)    |
| 29N24E30_03 | Patty C Mine (Pearl Mine)                       | ND   | OK    | 29N-24E-30 | 1-40  | MDHC (2020)    |
| 29N24E30_04 | 120 Acres                                       | ND   | OK    | 29N-24E-30 | 1-100 | MDHC (2020)    |
| 29N24E30_05 | Abrams Land                                     | ND   | OK    | 29N-24E-30 | 1-200 | MDHC (2020)    |
| 29N24E30_06 | Kaw Lead Co                                     | 1926 | OK    | 29N-24E-30 | 1-40  | MDHC (2020)    |
| 29N24E31_03 | Waxahachie and Red Eagle Lease                  | 1948 | OK    | 29N-24E-31 | 1-40  | MDHC (2020)    |
| 29N24E31_04 | Old Abe Mine                                    | ND   | OK    | 29N-24E-31 | 1-40  | MDHC (2020)    |
| 29N24E32_01 | Black Snake                                     | ND   | OK    | 29N-24E-32 | 1-40  | MDHC (2020)    |
| 34S23E34_02 | Karcher Land                                    | ND   | KS    | 34S-23E-34 | 1-100 | Keheley (2020) |
| 34S23E34_03 | Karcher                                         | ND   | KS    | 34S-23E-34 | 1-50  | Keheley (2020) |
| 34S24E26_01 | HHH Lease                                       | 1945 | KS    | 34S-24E-26 | 1-40  | MDHC (2020)    |
| 34S24E26_03 | HHH Lease                                       | 1945 | KS    | 34S-24E-26 | 1-40  | MDHC (2020)    |
| 34S24E31_01 | Sparlin                                         | 1949 | KS    | 34S-24E-31 | 1-50  | MDHC (2020)    |
| 34S24E33_01 | Paxson Mine w/ ore blocks                       | 1947 | KS    | 34S-24E-33 | 1-100 | MDHC (2020)    |
| 34S24E33_04 | Abel Swalley Land                               | 1937 | KS    | 34S-24E-33 | 1-100 | MDHC (2020)    |
| 34S24E34_01 | Brugger 160 Acres                               | ND   | KS    | 34S-24E-34 | 1-200 | MDHC (2020)    |
| 34S24E34_03 | Brugger 160 Acres                               | ND   | KS    | 34S-24E-34 | 1-100 | MDHC (2020)    |
| 34S24E34_04 | Brugger 160 Acres_Variation of _03              | ND   | KS    | 34S-24E-34 | 1-100 | MDHC (2020)    |
| 34S24E35_10 | Beck                                            | 1929 | KS    | 34S-24E-35 | 1-50  | MDHC (2020)    |
| 34S24E35_12 | Old M&H Mine                                    | 1944 | KS    | 34S-24E-35 | 1-50  | MDHC (2020)    |
| 35-01       | Cactus Mine                                     | 1959 | OK    | 29N-22E-1  | 1-100 | Keheley (2020) |
| 35S23E10_01 | Athletic Chubb (A.D. Chubb)                     | 1943 | KS    | 35S-23E-10 | 1-100 | MDHC (2020)    |
| 35S23E10_02 | Grace B                                         | 1939 | KS    | 35S-23E-10 | 1-50  | MDHC (2020)    |
| 35S23E10_04 | Big John-Black Eagle                            | 1946 | KS    | 35S-23E-10 | 1-100 | MDHC (2020)    |
| 35S23E10_08 | Big John-Black Eagle                            | 1946 | KS    | 35S-23E-10 | 1-100 | MDHC (2020)    |
| 35S23E10_09 | Big John                                        | 1946 | KS    | 35S-23E-10 | 1-100 | MDHC (2020)    |
| 35S23E10_12 | Jarrett Lease                                   | ND   | KS    | 35S-23E-10 | 1-100 | MDHC (2020)    |
| 35S23E10_18 | Big John D&E and Black Eagle A,B & F (K Bed)    | 1950 | KS    | 35S-23E-10 | 1-100 | MDHC (2020)    |
| 35S23E10_19 | Big John D&E and Black Eagle A,B & F (M Bed)    | 1950 | KS    | 35S-23E-10 | 1-100 | MDHC (2020)    |
| 35S23E10_20 | Big John D, E,H, &I and Black Eagle F&J (M Bed) | 1942 | KS    | 35S-23E-10 | 1-100 | MDHC (2020)    |
| 35S23E10_21 | Big John D&E and Black Eagle A,B & F (GH Bed)   | 1950 | KS    | 35S-23E-10 | 1-100 | MDHC (2020)    |
| 35S23E10_22 | Big John-Black Eagle (GH and E Bed)             | 1950 | KS    | 35S-23E-10 | 1-100 | MDHC (2020)    |
| 35S23E11_01 | Bendelari                                       | 1942 | KS    | 35S-23E-11 | 1-50  | MDHC (2020)    |

Appendix A Continued

| Map ID      | Map Title                                                  | Year | State | T-R-S        | Scale | Reference   |
|-------------|------------------------------------------------------------|------|-------|--------------|-------|-------------|
| 35S23E11_02 | DeArmand Mine                                              | 1929 | KS    | 35S-23E-11   | 1-40  | MDHC (2020) |
| 35S23E11_04 | Tulsa-Quapaw                                               | 1950 | KS    | 35S-23E-11   | 1-50  | MDHC (2020) |
| 35S23E11_05 | Tulsa-Quapaw_M                                             | ND   | KS    | 35S-23E-11   | 1-100 | MDHC (2020) |
| 35S23E11_09 | Fox Mine                                                   | 1948 | KS    | 35S-23E-11   | 1-50  | MDHC (2020) |
| 35S23E11_14 | Robinson (East side)                                       | 1944 | KS    | 35S-23E-11   | 1-40  | MDHC (2020) |
| 35S23E11_16 | Robinson (West side)                                       | ND   | KS    | 35S-23E-11   | 1-40  | MDHC (2020) |
| 35S23E11_18 | Bendelari                                                  | 1947 | KS    | 35S-23E-11   | 1-50  | MDHC (2020) |
| 35S23E11_21 | King Brand                                                 | 1939 | KS    | 35S-23E-11   | 1-50  | MDHC (2020) |
| 35S23E11_23 | King Brand                                                 | ND   | KS    | 35S-23E-11   | 1-50  | MDHC (2020) |
| 35S23E11_25 | Longacre Mine                                              | ND   | KS    | 35S-23E-11   | 1-50  | MDHC (2020) |
| 35S23E11_26 | Longacre Mine                                              | 1945 | KS    | 35S-23E-11   | 1-50  | MDHC (2020) |
| 35S23E11_27 | Wilbur Mine                                                | 1950 | KS    | 35S-23E-14   | 1-100 | MDHC (2020) |
| 35S23E11_29 | Wilbur Mine (K bed)                                        | 1950 | KS    | 35S-23E-14   | 1-100 | MDHC (2020) |
| 35S23E11_32 | Lawyers Mine                                               | 1929 | KS    | 35S-23E-14   | 1-40  | MDHC (2020) |
| 35S23E11_34 | Boska Mine                                                 | 1929 | KS    | 35S-23E-14   | 1-40  | MDHC (2020) |
| 35S23E11_36 | Boska Mine                                                 | 1929 | KS    | 35S-23E-14   | 1-40  | MDHC (2020) |
| 35S23E12_01 | Jarrett Mine                                               | 1946 | KS    | 35S-23E-12   | 1-100 | MDHC (2020) |
| 35S23E12_02 | Jarrett Mine                                               | 1946 | KS    | 35S-23E-12   | 1-100 | MDHC (2020) |
| 35S23E12_04 | Jarrett Mine_Variation of _03                              | ND   | KS    | 35S-23E-12   | 1-100 | MDHC (2020) |
| 35S23E12_08 | Webber Mine                                                | 1950 | KS    | 35S-23E-12   | 1-100 | MDHC (2020) |
| 35S23E12_10 | Kansouri Mine_Variation of _09                             | 1945 | KS    | 35S-23E-12   | 1-100 | MDHC (2020) |
| 35S23E12_11 | Cherokee Mine                                              | 1950 | KS    | 35S-23E-12   | 1-100 | MDHC (2020) |
| 35S23E13_01 | Blue Diamond Mine                                          | 1949 | KS    | 35S-23E-13   | 1-50  | MDHC (2020) |
| 35S23E13_02 | Blue Mound Mine (middle and upper levels)                  | 1949 | KS    | 35S-23E-13   | 1-50  | MDHC (2020) |
| 35S23E13_03 | Blue Mound Mine                                            | 1945 | KS    | 35S-23E-13   | 1-50  | MDHC (2020) |
| 35S23E13_04 | Chubb Mine                                                 | 1942 | KS    | 35S-23E-13   | 1-100 | MDHC (2020) |
| 35S23E13_05 | Chubb Mine_colored pencil outlines                         | 1942 | KS    | 35S-23E-13   | 1-100 | MDHC (2020) |
| 35S23E13_06 | Blue Diamond Mine                                          | 1945 | KS    | 35S-23E-13   | 1-50  | MDHC (2020) |
| 35S23E2_02  | Bilharz Mining Co. Sec 2 and 11_Sections hand drawn on _01 | ND   | KS    | 35S-23E-2,11 | 1-100 | MDHC (2020) |
| 35S23E2_08  | Northern                                                   | 1953 | KS    | 35S-23E-2    | 1-50  | MDHC (2020) |
| 35S23E3_05  | Big John-Lucky Jew Mines                                   | 1946 | KS    | 35S-23E-3    | 1-100 | MDHC (2020) |
| 35S23E3_08  | Lucky Jew-Parmenter "40"                                   | 1945 | KS    | 35S-23E-3    | 1-100 | MDHC (2020) |
| 35S23E3_09  | Big John-Lucky Jew Mines (upper beds)                      | 1947 | KS    | 35S-23E-3    | 1-100 | MDHC (2020) |

Appendix A Continued

| Map ID      | Map Title                                  | Year | State | T-R-S      | Scale | Reference      |
|-------------|--------------------------------------------|------|-------|------------|-------|----------------|
| 35S23E3_10  | Stebbins Fee                               | ND   | KS    | 35S-23E-3  | 1-100 | MDHC (2020)    |
| 35S23E3_11  | Karcher Mining Tract                       | 1947 | KS    | 35S-23E-3  | 1-100 | MDHC (2020)    |
| 35S23E3_13  | Stebbins - Lucky Jew                       | ND   | KS    | 35S-23E-3  | 1-100 | Keheley (2020) |
| 35S24E10_07 | Part of Ballard Area                       | 1949 | KS    | 35S-24E-10 | 1-100 | MDHC (2020)    |
| 35S24E10_09 | Bailey Part of Ballard Area                | 1940 | KS    | 35S-24E-10 | 1-100 | MDHC (2020)    |
| 35S24E10_13 | Ballard and Slaughter Part of Ballard Area | 1949 | KS    | 35S-24E-10 | 1-100 | MDHC (2020)    |
| 35S24E13_02 | Harrington Mine                            | 1943 | KS    | 35S-24E-13 | 1-50  | MDHC (2020)    |
| 35S24E13_03 | Harrington Mine                            | 1951 | KS    | 35S-24E-13 | 1-100 | MDHC (2020)    |
| 35S24E13_06 | CommonWealth No. 2                         | ND   | KS    | 35S-24E-13 | 1-40  | MDHC (2020)    |
| 35S24E13_09 | Hunter Land                                | ND   | KS    | 35S-24E-13 | 1-100 | MDHC (2020)    |
| 35S24E16_01 | Lucky OK Mine                              | 1952 | KS    | 35S-24E-16 | 1-40  | MDHC (2020)    |
| 35S24E16_02 | Lucky OK Mine                              | 1937 | KS    | 35S-24E-16 | 1-50  | MDHC (2020)    |
| 35S24E16_03 | Lucky OK Mine                              | ND   | KS    | 35S-24E-16 | 1-50  | MDHC (2020)    |
| 35S24E17_01 | Kansas Line Mine                           | ND   | KS    | 35S-24E-17 | 1-100 | MDHC (2020)    |
| 35S24E17_02 | Kansas Line Mine_West portion              | 1947 | KS    | 35S-24E-17 | 1-50  | MDHC (2020)    |
| 35S24E17_03 | John Stoskopf                              | 1943 | KS    | 35S-24E-17 | 1-100 | MDHC (2020)    |
| 35S24E2_01  | Homestake                                  | ND   | KS    | 35S-24E-2  | 1-50  | MDHC (2020)    |
| 35S24E2_05  | Racetrack Mine                             | ND   | KS    | 35S-24E-2  | 1-40  | MDHC (2020)    |
| 35S24E2_06  | Racetrack Mine                             | 1948 | KS    | 35S-24E-2  | 1-40  | MDHC (2020)    |
| 35S24E2_09  | Clara Jane                                 | ND   | KS    | 35S-24E-2  | 1-50  | MDHC (2020)    |
| 35S24E2_10  | Clara Jane                                 | ND   | KS    | 35S-24E-2  | 1-50  | MDHC (2020)    |
| 35S24E2_11  | Beck No. 3 (Wakeman and Hocker Leases)     | 1929 | KS    | 35S-24E-2  | 1-50  | MDHC (2020)    |
| 35S24E2_16  | Leopard_similar to _15                     | 1947 | KS    | 35S-24E-2  | 1-100 | MDHC (2020)    |
| 35S24E2_19  | North Ballard Area                         | 1949 | KS    | 35S-24E-2  | 1-50  | MDHC (2020)    |
| 35S24E2_22  | Portion of Ballard Area                    | 1946 | KS    | 35S-24E-2  | 1-100 | MDHC (2020)    |
| 35S24E3_01  | Hartley                                    | ND   | KS    | 35S-24E-3  |       | MDHC (2020)    |
| 35S24E3_02  | Portion of Ballard Area                    | 1957 | KS    | 35S-24E-3  | 1-100 | MDHC (2020)    |
| 35S24E3_03  | English 'O                                 | 1952 | KS    | 35S-24E-3  | 1-40  | MDHC (2020)    |
| 35S24E3_04  | Smith                                      | 1947 | KS    | 35S-24E-3  | 1-50  | MDHC (2020)    |
| 35S24E3_05  | English 'O                                 | 1946 | KS    | 35S-24E-3  | 1-100 | MDHC (2020)    |
| 35S24E4_01  | Swalley "D" Mine                           | 1947 | KS    | 35S-24E-4  | 1-100 | MDHC (2020)    |
| 35S24E6_01  | MacArthur                                  | 1951 | KS    | 35S-24E-6  | 1-50  | MDHC (2020)    |
| 35S24E6_04  | MacArthur                                  | ND   | KS    | 35S-24E-6  |       | MDHC (2020)    |

Appendix A Continued

| Map ID     | Map Title                          | Year | State  | T-R-S        | Scale | Reference      |
|------------|------------------------------------|------|--------|--------------|-------|----------------|
| 35S24E7_01 | Foley                              | 1950 | KS     | 35S-24E-7    | 1-100 | MDHC (2020)    |
| 35S24E7_04 | Westside Mine                      | 1950 | KS     | 35S-24E-7    | 1-100 | MDHC (2020)    |
| 35S24E7_06 | Westside Mine (Upper levels)       | 1944 | KS     | 35S-24E-7    | 1-100 | MDHC (2020)    |
| 35S24E7_07 | Harris Old Lease No. 24 (Big Yank) | 1947 | KS     | 35S-24E-7    | 1-40  | MDHC (2020)    |
| 35S24E7_09 | Big Yank                           | ND   | KS     | 35S-24E-7    | 1-40  | MDHC (2020)    |
| 35S24E7_11 | Blue Mound Mine                    | ND   | KS     | 35S-24E-7    | 1-40  | MDHC (2020)    |
| 35S24E7_12 | Harris Mine Lease 24               | 1946 | KS     | 35S-24E-7    | 1-40  | MDHC (2020)    |
| 35S24E7_14 | Lease No. 24                       | ND   | KS     | 35S-24E-7    | 1-40  | MDHC (2020)    |
| 37-02      | Blue-Bird Wilson Mine              | 1968 | OK     | 29N-22E-25   | 1-100 | Keheley (2020) |
| 409-N      | Half Section Maps_Brichta          | 1957 | OK     | 29N-23E-32   | 1-200 | Keheley (2020) |
| 413-S      | Half Section Maps_Brichta          | 1958 | OK     | 29N-23E-36   | 1-200 | Keheley (2020) |
| 434-Na     | Half Section Maps_Brichta          | 1956 | OK     | 29N-23E-29   | 1-200 | Keheley (2020) |
| 434-Nb     | Half Section Maps_Brichta          | 1956 | OK     | 29N-23E-29   | 1-200 | Keheley (2020) |
| 434-Nc     | Half Section Maps_Brichta          | 1956 | OK     | 29N-23E-29   | 1-200 | Keheley (2020) |
| 434-Nd     | Half Section Maps_Brichta          | 1956 | OK     | 29N-23E-29   | 1-200 | Keheley (2020) |
| 434-S      | Half Section Maps_Brichta          | 1956 | OK     | 29N-23E-29   | 1-200 | Keheley (2020) |
| DM10       | Picher_Workings                    | 1944 | OK, KS | Picher Field |       | MDHC (2020)    |
