# Supplementary material
Source: publisher figshare collection journal article supplement (https://tandf.figshare.com/articles/dataset/_/19554674)
Supplement: Supplementary file 2 [file 2]

# Picher Field Underground Mine Workings of the Abandoned Tri-State Lead-Zinc Mining District in the United States

Nicholas L. Shepherd<sup>1\*</sup>, Ed Keheley<sup>2</sup> Russell C. Dutnell<sup>3</sup>, Carlton A. Folz<sup>1</sup>, Brandon Holzbauer-Schweitzer<sup>1</sup>, and Robert W. Nairn<sup>1</sup>

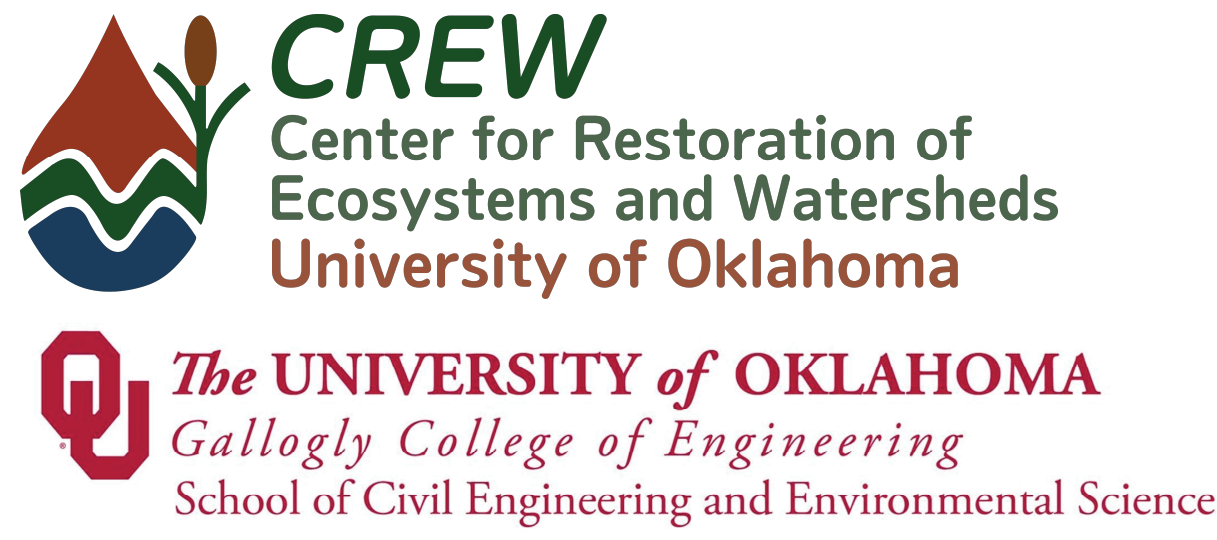

<sup>1</sup>Center for Restoration of Ecosystems and Watersheds  
School of Civil Engineering and Environmental Science, University of Oklahoma,  
202 W. Boyd St. Room 334, Norman, OK 73019-1024

<sup>2</sup>Keheley and Associates Inc,  
220 S 640 Rd, Quapaw, OK 74363

<sup>3</sup>Riverman Engineering, PLC,  
1504 Ann Arbor, Norman, OK 73069

\*Corresponding author: Nick.Shepherd@ou.edu

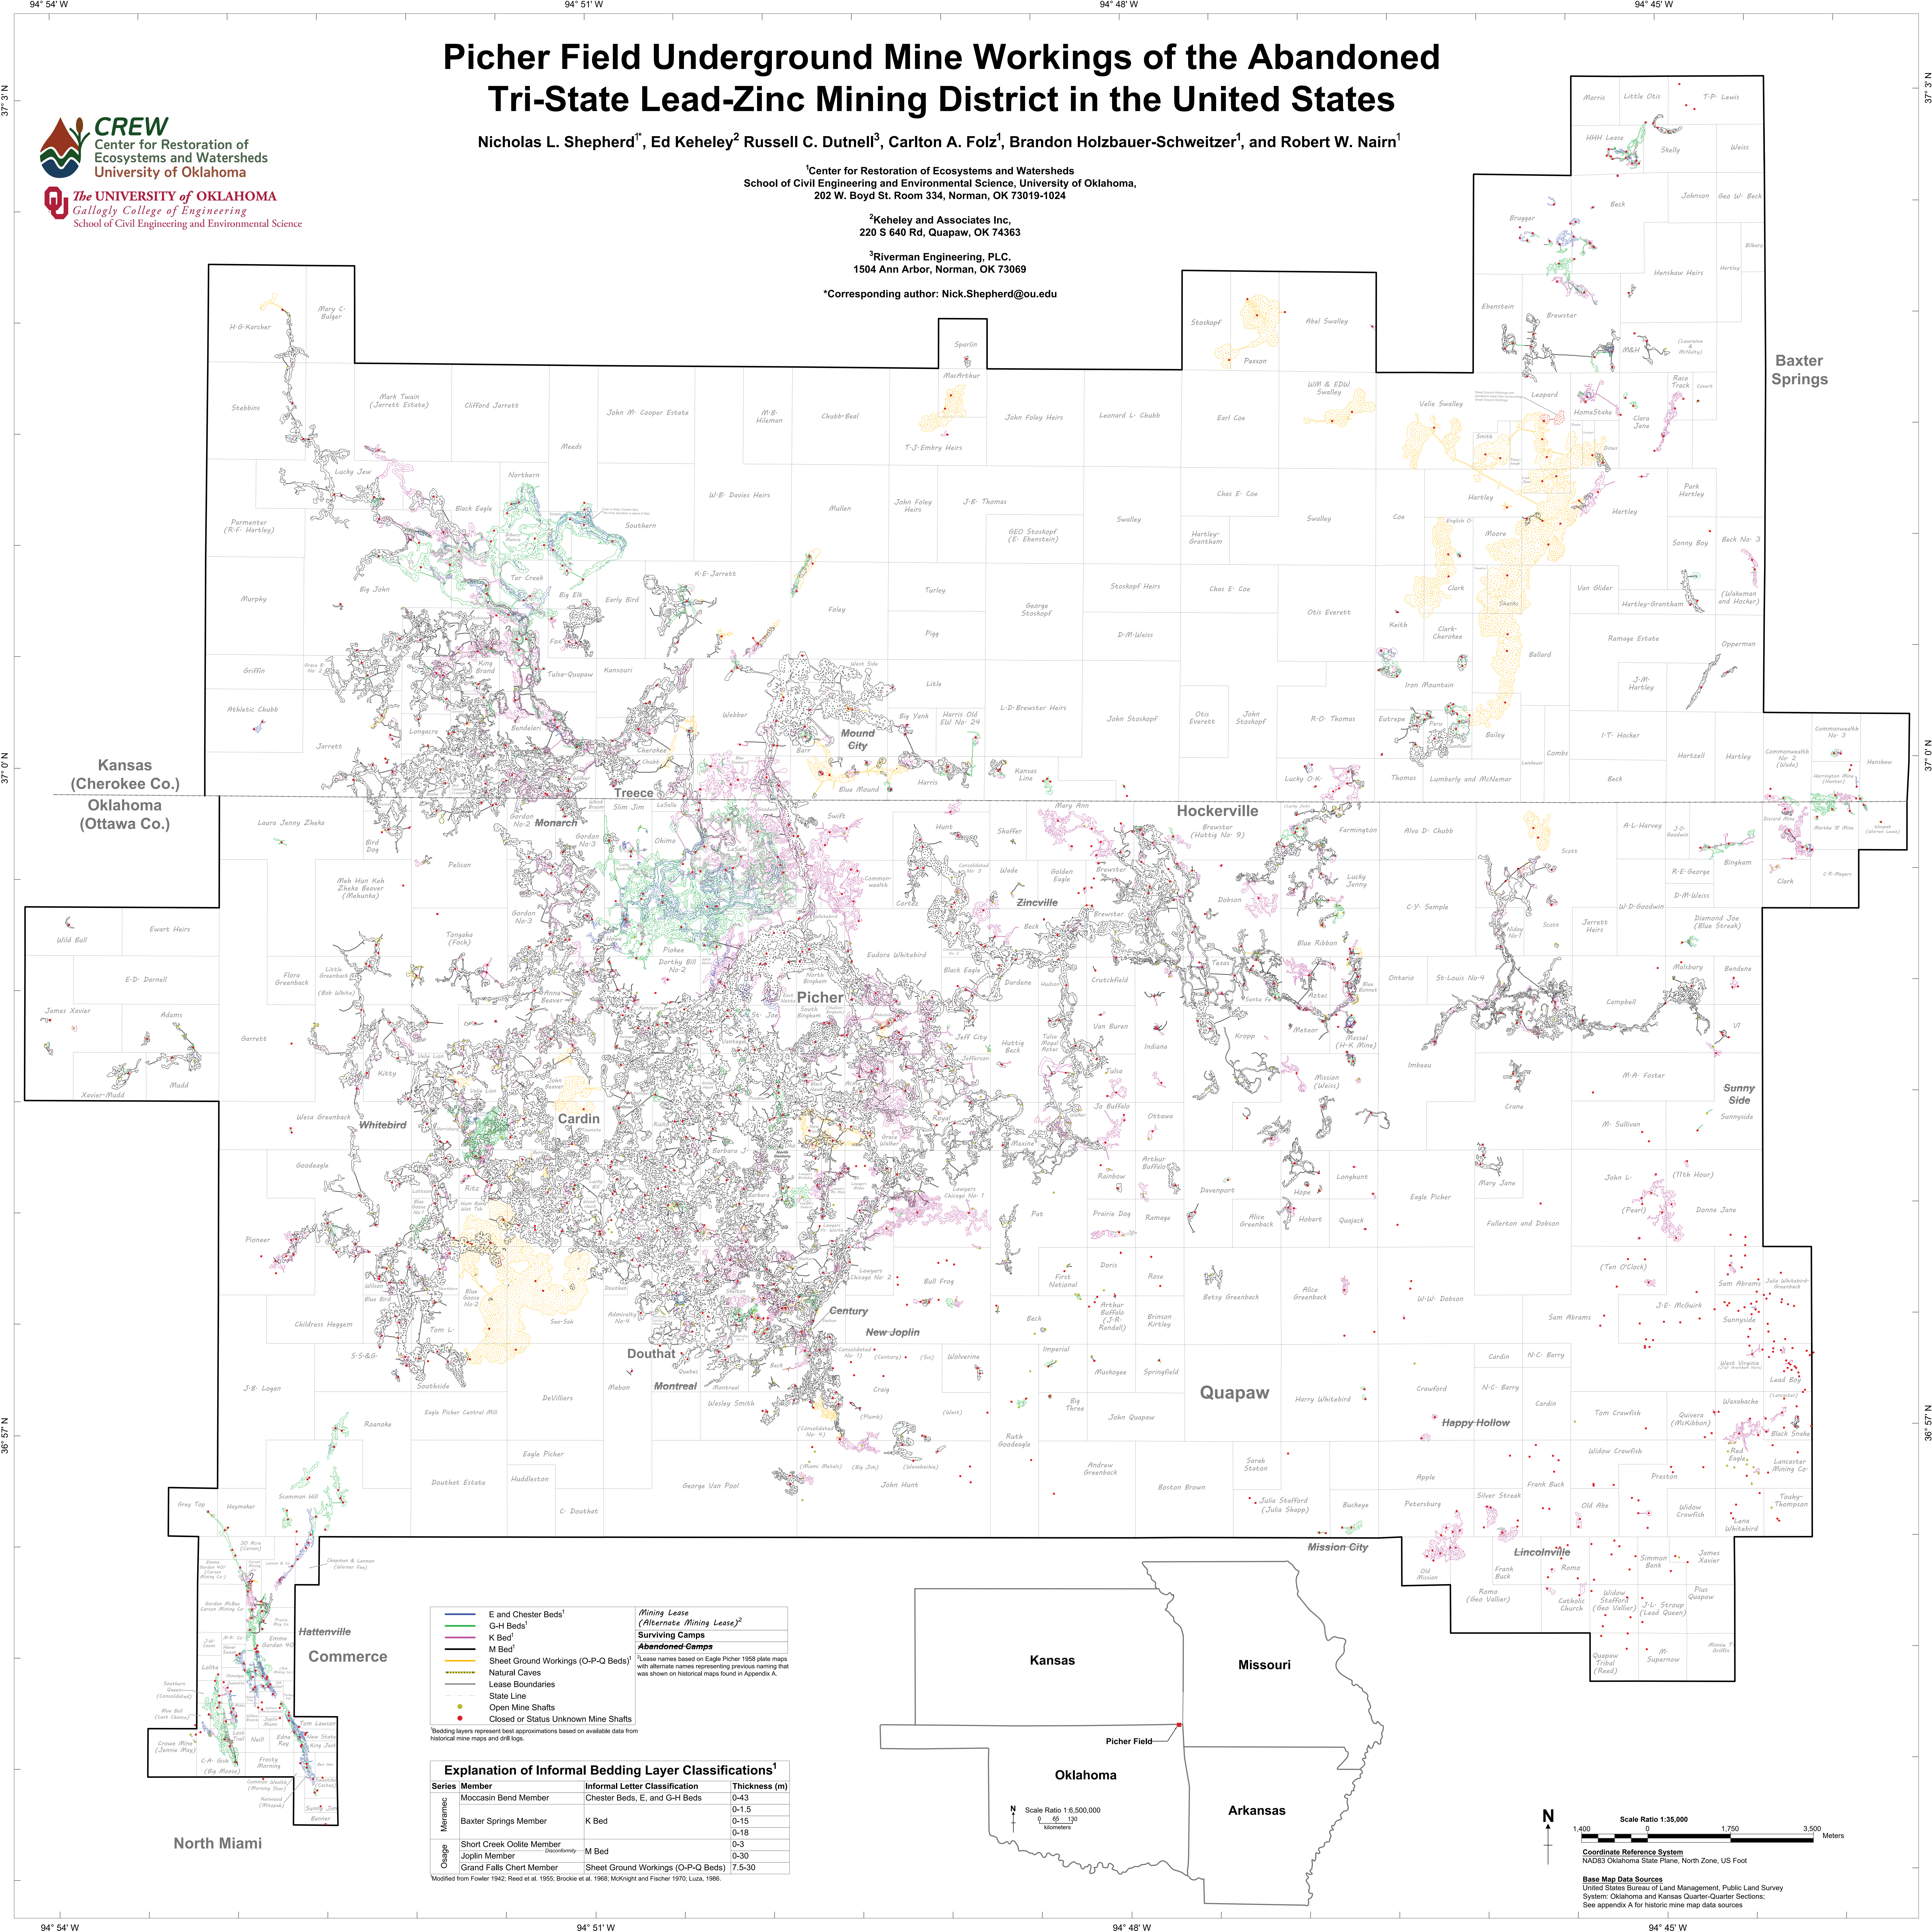

**Mining Lease (Alternate Mining Lease)<sup>2</sup>**  
**Surviving Camps**  
**Abandoned Camps**  
<sup>1</sup>Lease names based on Eagle Picher 1958 plate maps with alternate names representing previous naming that was shown on historical maps found in Appendix A.

| Explanation of Informal Bedding Layer Classifications <sup>1</sup>                                       |                           |                                    |               |
|----------------------------------------------------------------------------------------------------------|---------------------------|------------------------------------|---------------|
| Series                                                                                                   | Member                    | Informal Letter Classification     | Thickness (m) |
| Meramec                                                                                                  | Moccasin Bend Member      | Chester Beds, E, and G-H Beds      | 0-43          |
|                                                                                                          | Baxter Springs Member     | K Bed                              | 0-1.5         |
|                                                                                                          | Short Creek Oolite Member | M Bed                              | 0-15          |
| Osage                                                                                                    | Joelinton Member          | M Bed                              | 0-18          |
|                                                                                                          | Joelinton Member          | M Bed                              | 0-3           |
|                                                                                                          | Grand Falls Chert Member  | Sheet Ground Workings (O-P-Q Beds) | 0-30          |
| Modified from Fowler 1942; Reed et al. 1955; Brockie et al. 1968; McKnight and Fischer 1970; Luza, 1988. |                           |                                    |               |

**Base Map Data Sources**  
United States Bureau of Land Management, Public Land Survey  
System: Oklahoma and Kansas Quarter-Quarter Sections;  
See appendix A for historic mine map data sources
